# Supplementary material for: A multi-encoder variational autoencoder controls multiple transformational features in single-cell image analysis
Source: PubMed Central journal article supplement (PMC8943013; doi:10.1038/s42003-022-03218-x), 2022-03-23
Supplement: 42003_2022_3218_MOESM4_ESM.pdf [file 42003_2022_3218_MOESM4_ESM.pdf]

## **Description of Additional Supplementary Files**

File Name: Supplementary Data 1

Description: EGFR intensity, cell size features for Figure 2a and EGFR Radial slope features for Figure 2h
